# Supplementary material
Source: PubMed Central journal article supplement (PMC8212388)
Supplement: NIHMS1708026-supplement-1.pdf [file NIHMS1708026-supplement-1.pdf]

**Supplementary Table 1.** Characteristics of Non-respondents and Respondents

| Continuous Variables                | Non-respondents |           | Respondents |           | <i>t</i> | <i>p</i> |
|-------------------------------------|-----------------|-----------|-------------|-----------|----------|----------|
|                                     | <i>M</i>        | <i>SD</i> | <i>M</i>    | <i>SD</i> |          |          |
| Age                                 | 84.6            | 8.8       | 85.2        | 8.8       | -0.57    | 0.568    |
| Years Since Diagnosis               | 4.7             | 3.0       | 3.6         | 2.5       | 3.30     | 0.001    |
| Years of Education                  | 15.0            | 3.2       | 16.4        | 3.4       | -3.73    | < 0.001  |
| MMSE                                | 22.0            | 10.0      | 24.1        | 14.4      | -1.53    | 0.127    |
| CDR Sum of Boxes                    | 4.9             | 5.1       | 5.1         | 5.0       | -0.47    | 0.640    |
| NPI Severity Sum                    | 3.8             | 4.1       | 4.2         | 4.7       | -0.94    | 0.348    |
| Years from Visit to GARS-2          | 1.6             | 1.8       | 0.6         | 1.0       | 6.15     | < 0.001  |
| Discrete Variables                  | <i>n</i>        | %         | <i>n</i>    | %         | $\chi^2$ | <i>p</i> |
| Female                              | 99              | 0.57      | 69          | 0.47      | 2.77     | 0.25     |
| Nonwhite                            | 38              | 0.22      | 8           | 0.05      | 18.70    | < 0.001  |
| Demented                            | 96              | 0.55      | 90          | 0.62      | 5.26     | 0.26     |
| $\geq 1$ Copy of ApoE4 <sup>a</sup> | 76              | 0.49      | 68          | 0.50      | 0.05     | 0.97     |

*Note:* Three respondents with ApoE data were excluded from analyses due to completing GARS-2 more  $\pm 2$  years since most previous study visit; this is why available ApoE data here for respondents might appear discrepant with Table 3. *CDR* = Clinical Dementia Rating. *MMSE* = Mini-Mental Status Exam. *NPI* = Neuropsychiatric Inventory.

<sup>a</sup>ApoE data available for 156 nonrespondents and 136 respondents.
